# Supplementary material for: Urinary Long Non-Coding RNA Levels as Biomarkers of Lupus Nephritis
Source: MDPI journal article supplement (doi:10.3390/ijms241411813), 2023-07-22
Supplement: s1 [file s1]

**Supplementary Table S1. Correlation between urinary lncRNA levels and clinical parameters\***

| lncRNA targets        | MEG3                 | ANRIL                | lnc-MGC             | MALAT                | CASC2                | TUG1                |
|-----------------------|----------------------|----------------------|---------------------|----------------------|----------------------|---------------------|
| eGFR                  | r=0.129,<br>p=0.5    | r=0.175,<br>p=0.4    | r=0.465,<br>p=0.011 | r=0.111,<br>p=0.3    | r=-0.360,<br>p=0.001 | r=0.706,<br>p=0.01  |
| proteinuria           | r=-0.423,<br>p=0.018 | r=-0.483,<br>p=0.008 | r=0.197,<br>p=0.3   | r=-0.096,<br>p=0.4   | r=-0.025,<br>p=0.8   | r=-0.510,<br>p=0.09 |
| SLEDAI                | r=-0.383,<br>p=0.034 | r=-0.334,<br>p=0.08  | r=0.064,<br>p=0.7   | r=-0.060,<br>p=0.6   | r=-0.138,<br>p=0.2   | r=-0.053,<br>p=0.0  |
| anti-ds DNA titre     | r =-0.146,<br>p=0.4  | r=-0.077,<br>p=0.7   | r=0.245,<br>p=0.2   | r=-0.011,<br>p=0.9   | r=-0.232,<br>p=0.033 | r=-0.182,<br>p=0.6  |
| serum C3 level        | r=-0.107,<br>p=0.5   | r=0.024,<br>p=0.9    | r=-0.273, p<br>=0.3 | r=0.235,<br>p=0.038  | r=0.041,<br>p=0.7    | r=-0.053,<br>p=0.9  |
| serum C4 level        | r=0.057,<br>p=0.8    | r=-0.106,<br>p=0.6   | r=-0.093,<br>p=0.6  | r=0.134,<br>p=0.2    | r=0.089,<br>p=0.4    | r=-0.051,<br>p=0.9  |
| kidney pathology      |                      |                      |                     |                      |                      |                     |
| activity index        | r=-0.311,<br>p=0.089 | r=-0.142,<br>p=0.5   | r=-0.053,<br>p=0.8  | r=-0.321,<br>p=0.004 | r=-0.217,<br>p=0.056 | r=-0.051,<br>p=0.9  |
| chronicity index      | r=-0.161,<br>p=0.4   | r=-0.286,<br>p=0.13  | r=-0.281,<br>p=0.14 | r=-0.062,<br>p=0.6   | r=-0.096,<br>p=0.4   | r=-0.276,<br>p=0.4  |
| glomerulosclerosis    | r=-0.015,<br>p=0.9   | r=-0.178,<br>p=0.4   | r=-0.170,<br>p=0.4  | r=-0.119,<br>p=0.3   | r=-0.061,<br>p=0.6   | r=-0.257,<br>p=0.4  |
| interstitial fibrosis | r=-0.197,<br>p=0.3   | r=-0.356,<br>p=0.06  | r=-0.189,<br>p=0.3  | r=-0.078,<br>p=0.5   | r=-0.049,<br>p=0.7   | r=-0.276,<br>p=0.4  |

\*Data were analyzed by the Spearman's correlation coefficient.
